# Supplementary material
Source: MDPI journal article supplement (https://www.mdpi.com/2311-7524/10/2/193)
Supplement: s1 [file s1]

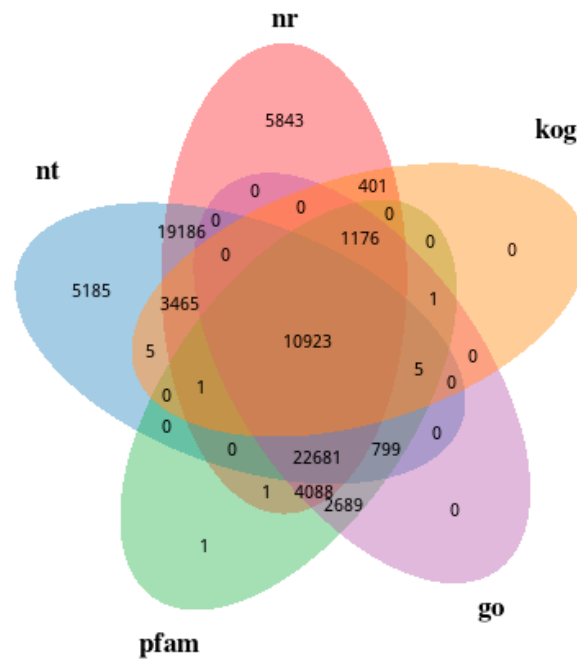

Figure. S1 Veen

### Species classification

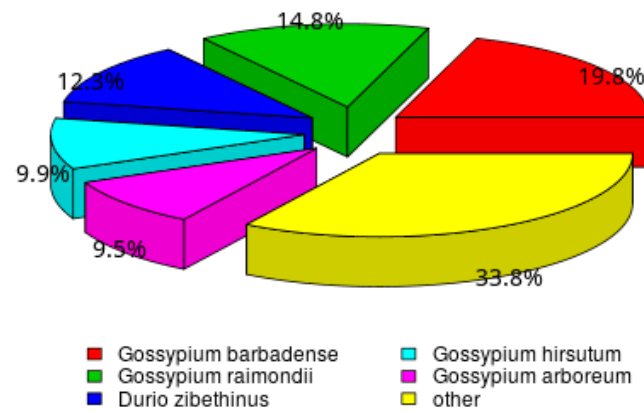

Figure. S2 Species distribution map of NR library ratio pairs of okra Unigene sequence

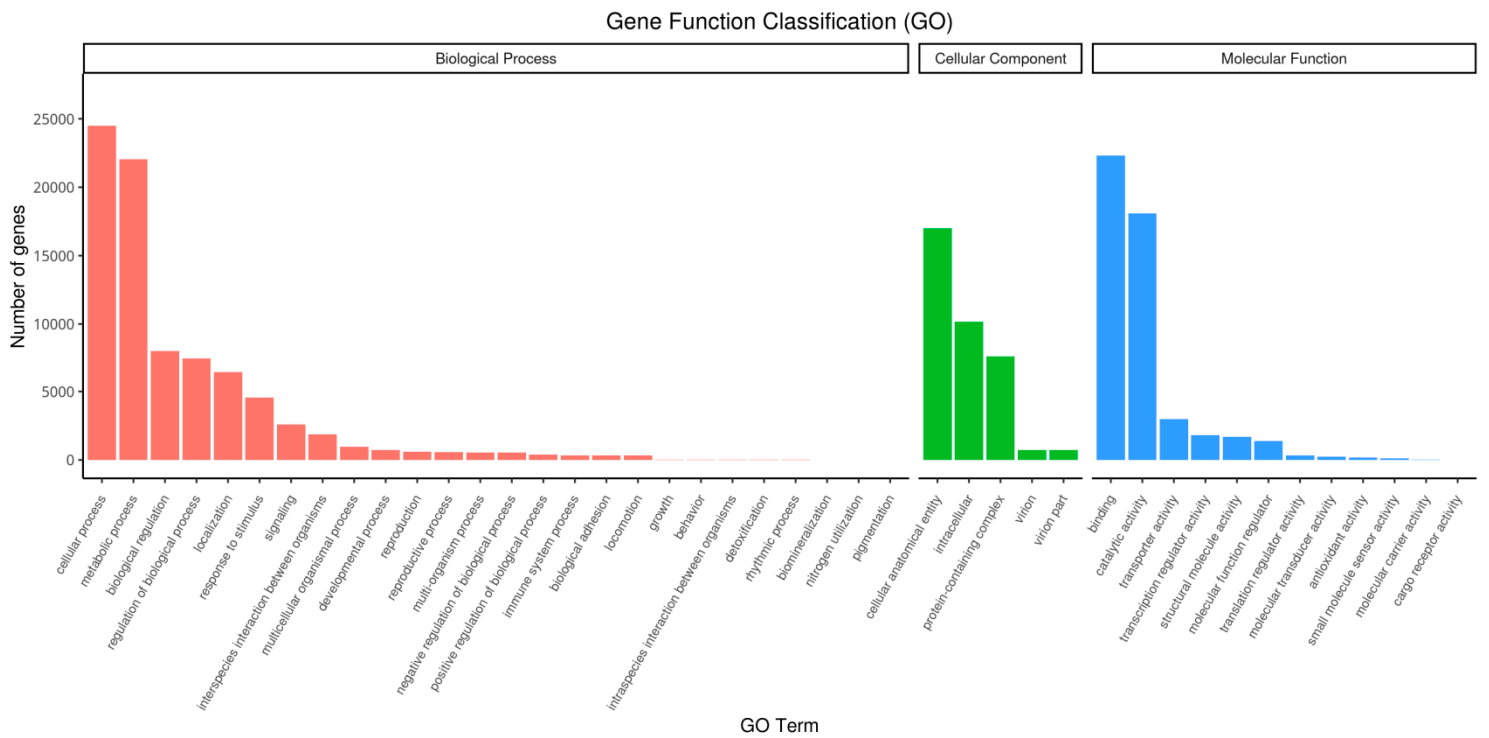

**Figure. S3** GO annotation classification statistics of okra Unigene sequence

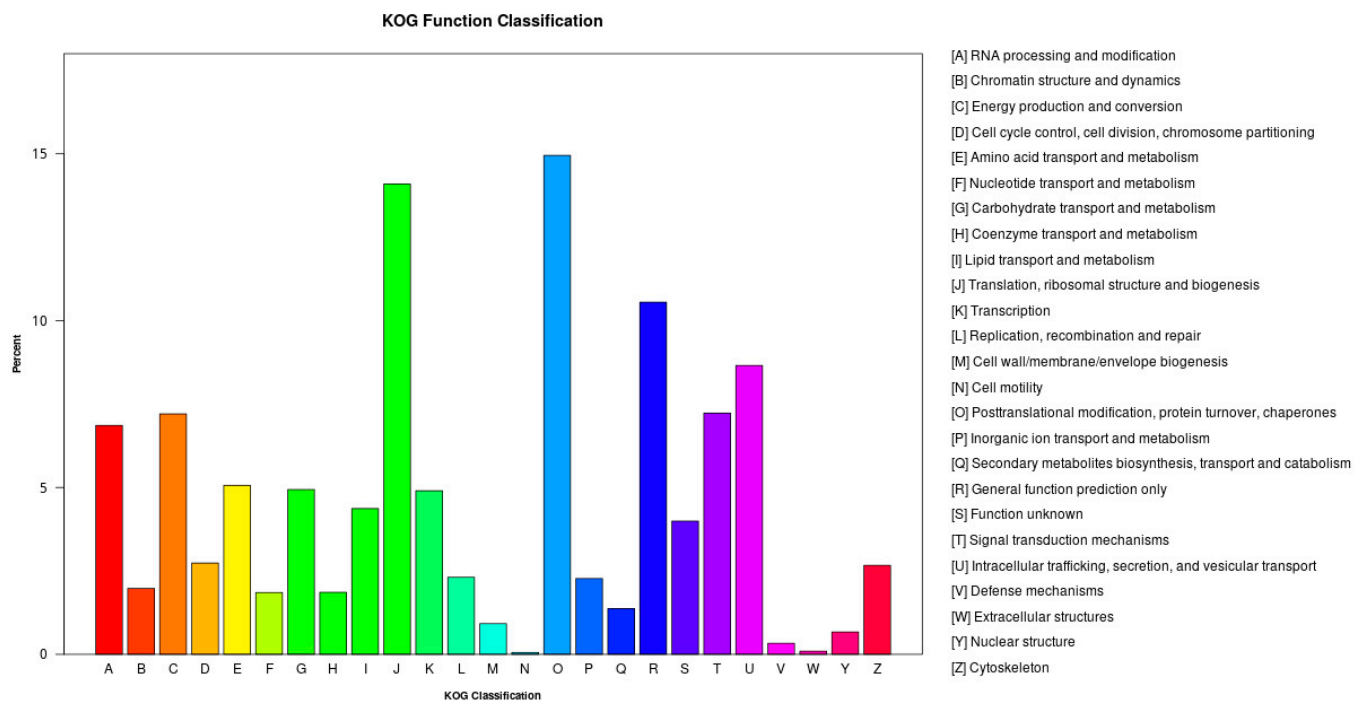

**Figure. S4** KOG annotation classification statistical map of okra Unigene sequence

### KEGG Classification

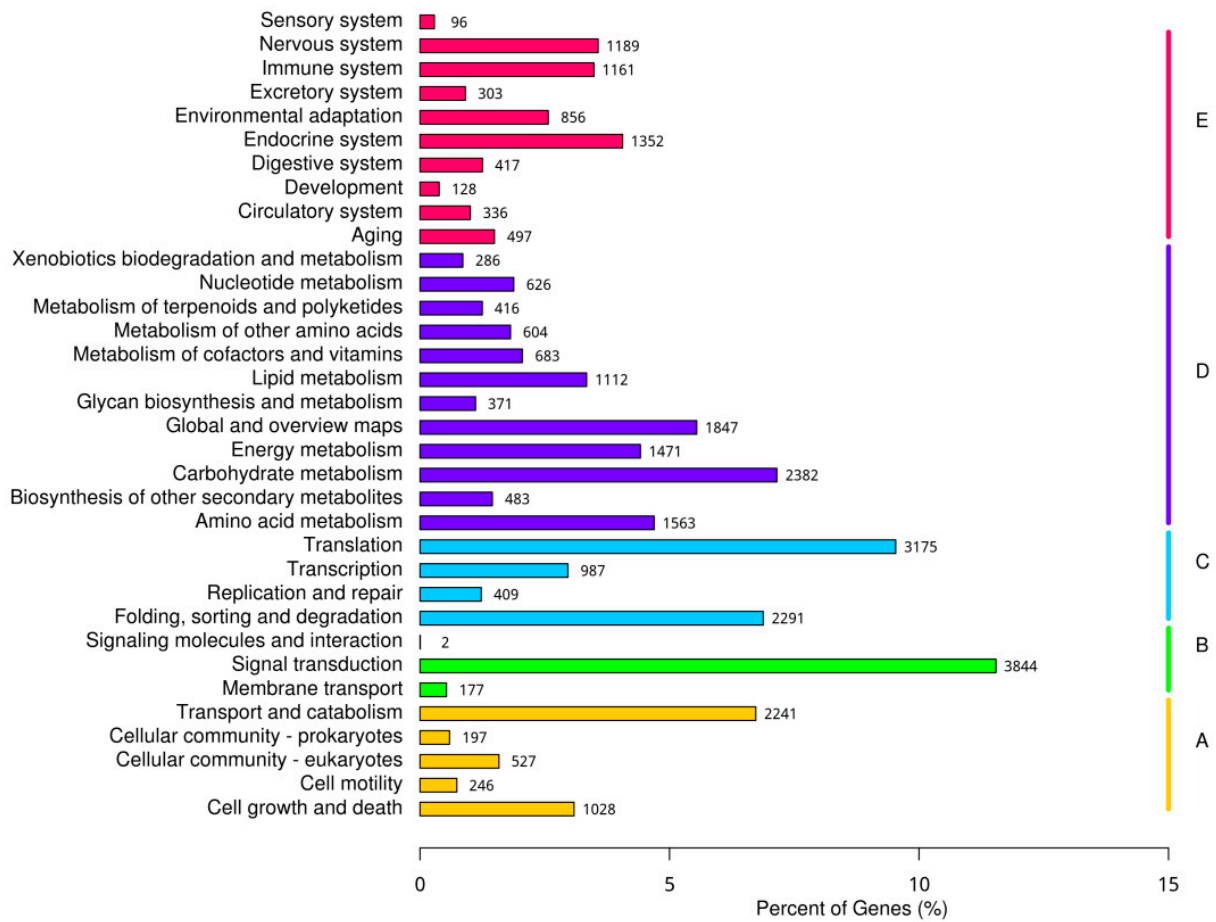

**Figure. S5** KEGG metabolic pathway classification statistics of okra Unigene sequence

**Table. S1** Summary of sequencing quality

| Sample    | Clean-reads | Clean-bases | Error rate | Q20   | Q30   | GC (%) |
|-----------|-------------|-------------|------------|-------|-------|--------|
| Control 1 | 19,271,851  | 5.8         | 0.03       | 97.65 | 93.25 | 43.82  |
| Control 2 | 23,018,404  | 6.9         | 0.02       | 98.27 | 94.62 | 45     |
| Control 3 | 20,932,939  | 6.3         | 0.03       | 97.47 | 92.9  | 44.31  |
| OTEO 1    | 21,061,634  | 6.3         | 0.03       | 97.59 | 93.09 | 44.19  |
| OTEO 2    | 20,252,807  | 6.1         | 0.03       | 97.46 | 92.83 | 44.3   |
| OTEO 3    | 21,322,456  | 6.4         | 0.03       | 97.64 | 93.24 | 44.61  |

**Table. S2** gene annotation results

| Database Type | Unigenes | Proportion (%) |
|---------------|----------|----------------|
| NR            | 67,765   | 70.24          |
| NT            | 62,250   | 64.52          |
| PFAM          | 42,365   | 43.91          |
| GO            | 42,362   | 43.91          |
| KOG           | 15,977   | 16.56          |
